# Supplementary material for: Hierarchically structured carbon nanotube–polyaniline nanobrushes for corrosion protection over a wide pH range
Source: Royal Society of Chemistry journal article supplement (doi:10.1039/c7ra05235a), 2017-01-01
Supplement: c7ra05235a1.pdf [file c7ra05235a1.pdf]

## Supporting information

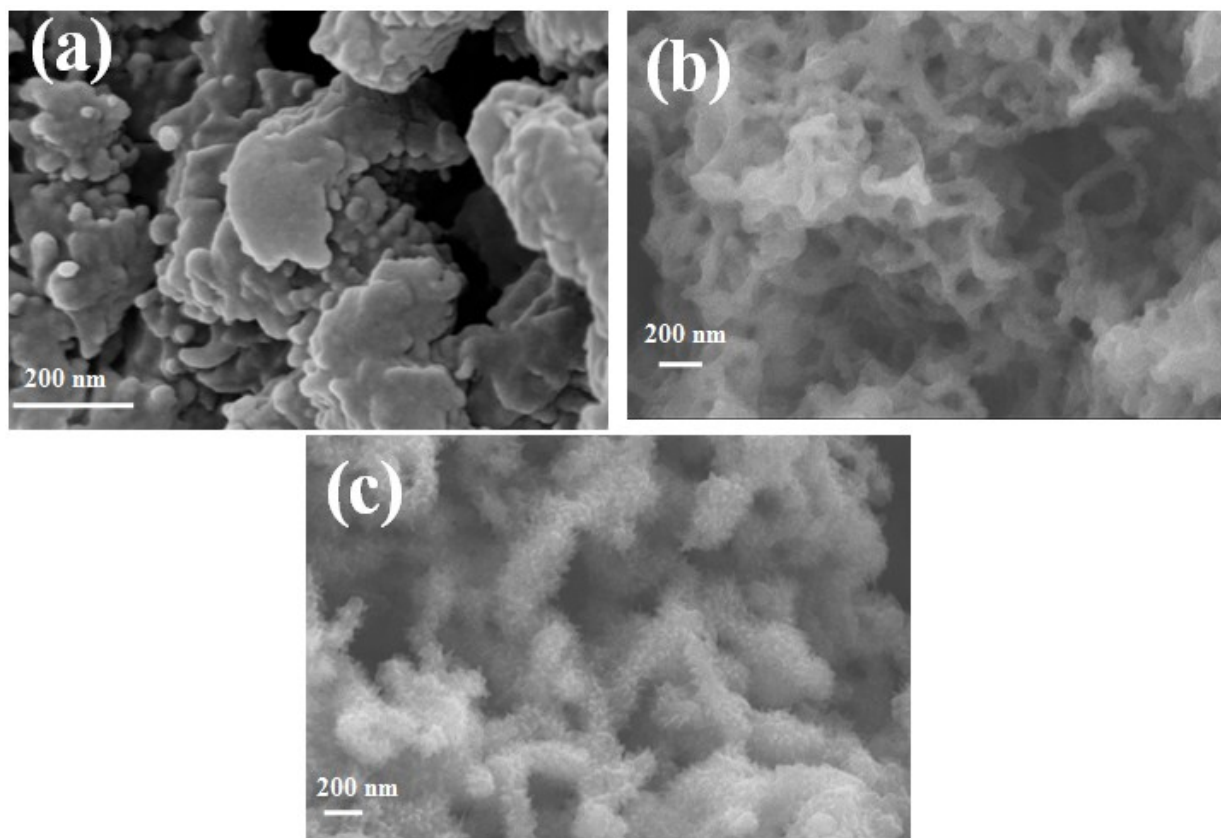

Figure 1 The SEM images of PANI (a) and c-PANI composites with  $W_r$  of 1:4 (b) and 1:8 (c)

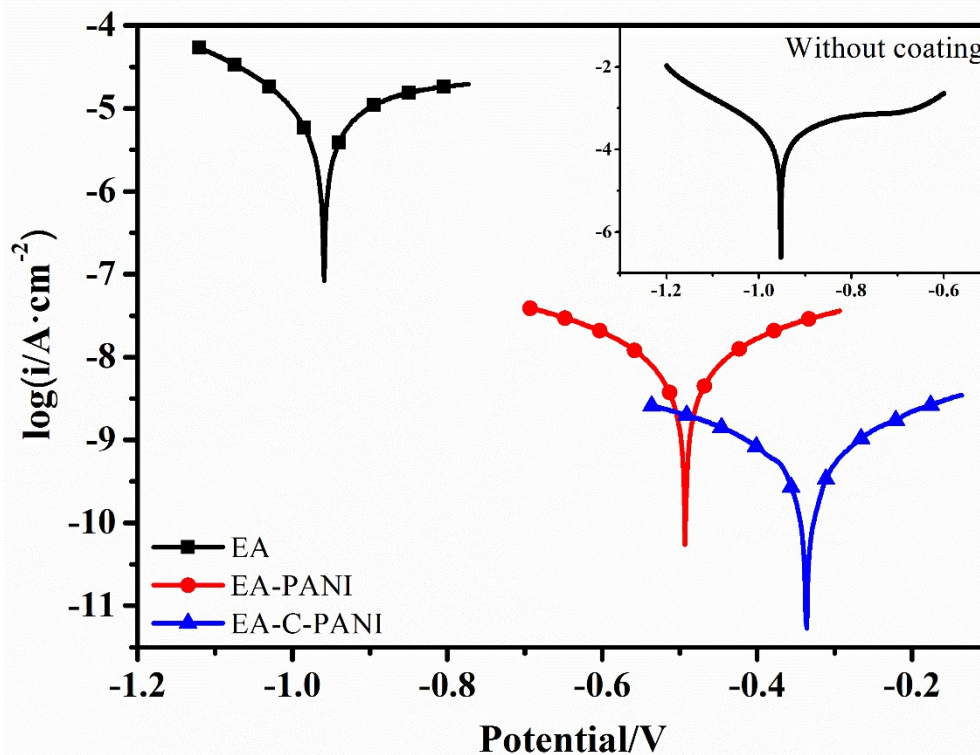

Figure 2 Tafel plots for (a) bare EA-coated, (b) PANI-coated, (c) CP-coated electrodes measured in 3.5 wt.% NaCl aqueous solution

Table 1 Electrochemical corrosion measurements of EA-coated, PANI-coated and CP-coated in 3.5 wt.% NaCl aqueous solution

|           | $E_{\text{corr}}/V$ | $I_{\text{corr}}/A \cdot \text{cm}^{-2}$ |
|-----------|---------------------|------------------------------------------|
| EA        | -0.959              | $1.20 \times 10^{-5}$                    |
| EA-PANI   | -0.493              | $9.40 \times 10^{-9}$                    |
| EA-C-PANI | -0.336              | $5.87 \times 10^{-10}$                   |
